# Supplementary material
Source: PubMed Central journal article supplement (PMC3299306)
Supplement: supp_msq164_mbe-10-0232-File009.pdf [file supp_msq164_mbe-10-0232-File009.pdf]

Supplementary Information for Haasl & Payseur.

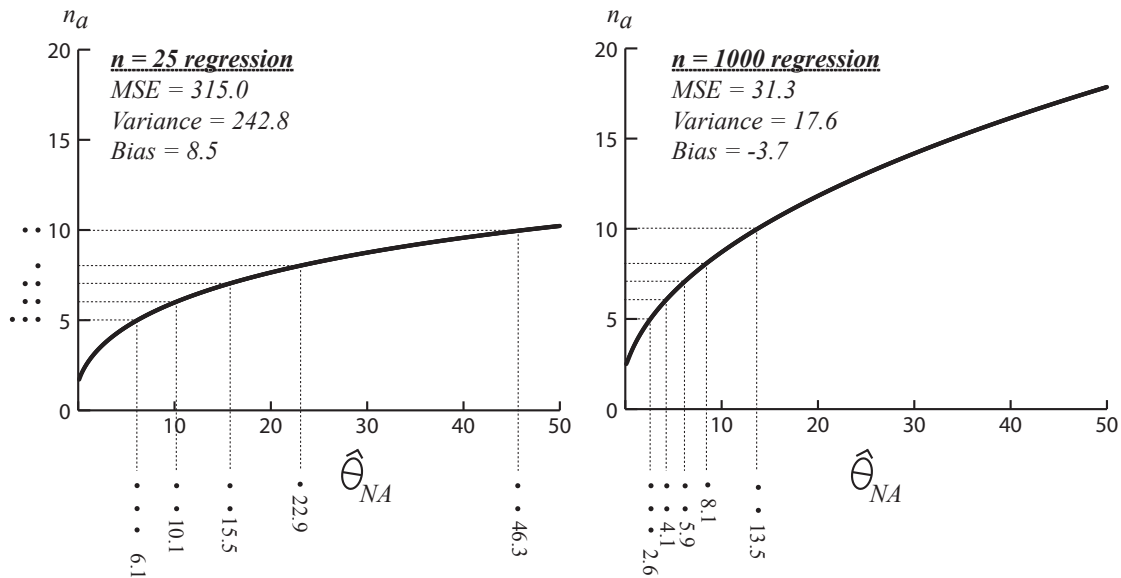

SUPPLEMENTARY FIGURE 1. Using a version of equation (7) that is specific to the actual sample size can lead to large overestimates of  $\theta$ . In this case, 10 data sets of  $n = 25$  were simulated with true  $\theta = 10$ . This particular set of 10 data sets was chosen for its extremity. The  $n_a$  were: 5, 5, 5, 6, 6, 7, 7, 8, 10, 10. These values of  $n_a$  are mapped to estimates  $\hat{\theta}_{NA}$  using the  $n = 25$  regression (left panel) and  $n = 1000$  regression (right panel). Despite the fact that the  $n_a$  vs  $\theta$  curve in the left panel accurately corresponds to the average  $n_a$  for each  $\theta$  when  $n = 25$ , its flat slope can lead to wild overestimates of  $\theta$  when an unusually large value of  $n_a$  is obtained. Using the  $n = 1000$  regression buffers against such overestimates, leading to an MSE that is 1/10th of that using the  $n = 25$  regression.

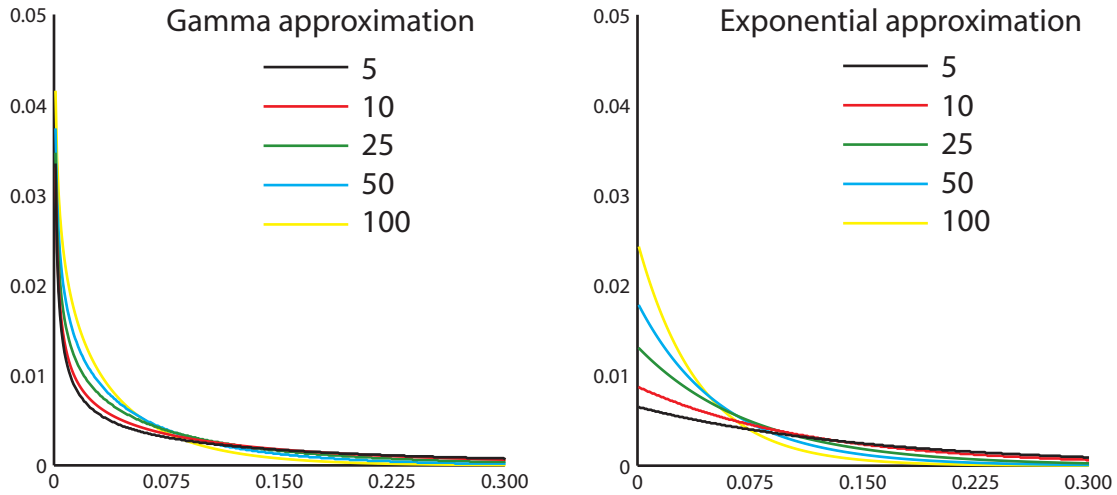

SUPPLEMENTARY FIGURE 2. When estimating  $\theta$  based on the vector of observed allele frequencies, the exponential approximation to the microsatellite frequency spectrum leads to more accurate estimates of  $\theta$  than the gamma approximation. This is despite the fact that the gamma approximation describes empirical frequencies much better than the gamma approximation. Here, spectra for  $\theta = 5, 10, 25, 50,$  and  $100$  are plotted on the interval  $(0, 0.3]$ , with the gamma approximation on the left and the exponential approximation on the right. As  $\theta$  changes, changes to the empirical approximation are most extreme along the very allele frequency intervals that change the most with  $\theta$ . For example, exponential approximations for  $\theta = 5$  and  $\theta = 25$  are quite divergent for allele frequencies on the interval  $(0, 0.05]$ , while the corresponding gamma approximations show much less divergence. To a lesser extent, divergence between the exponential approximations on the allele frequency interval  $(0.075, 0.3)$  are greater than those between the corresponding gamma approximations. As  $\theta$  increases, allele frequencies  $< 0.05$  (especially  $< 0.01$ ) become much more common and allele frequencies  $> 0.1$  become much more rare. The form of the exponential approximation is better suited to diagnose these differences.

SUPPLEMENTARY TABLE 1. **Intercepts and regression coefficients for equations (7) and (8).**

| $n$  | equation (7) |          |          | equation (8) |
|------|--------------|----------|----------|--------------|
|      | $c_0$        | $c_1$    | $c_2$    | $a_0$        |
| 25   | 1.5384       | -0.05558 | -0.01983 | 0.57991      |
| 50   | 1.6831       | -0.03792 | -0.01655 | 0.53729      |
| 100  | 1.8157       | -0.04686 | -0.01017 | 0.49990      |
| 150  | 1.8816       | -0.05574 | -0.00673 | 0.46722      |
| 200  | 1.9210       | -0.05735 | -0.00557 | 0.45206      |
| 250  | 1.9486       | -0.06295 | -0.00387 | 0.43252      |
| 500  | 2.0357       | -0.07910 | -0.00007 | 0.39704      |
| 1000 | 2.0845       | -0.08290 | 0.00110  | 0.35311      |

SUPPLEMENTARY TABLE 2. **Sample size and  $\theta$  estimation.** MSE and bias (in parentheses) are shown. All statistics based on 150 independent data sets.  $n$  and  $\theta$  in the two leftmost columns refer to the simulation parameters. The first row of the header refers to the version of equation (7) used to perform estimation. The results imply a complicated relationship between  $\theta$ ,  $n$ , and our methods of estimation. Generally, MSE and bias are reduced by using a version of equation (7) specific to a value of  $n$  that is greater than actual sample size.

| $n$ | $\theta$ | $\underline{n = 25}$ |                     | $\underline{n = 50}$ |                     | $\underline{n = 100}$ |                     | $\underline{n = 150}$ |                     | $\underline{n = 250}$ |                     | $\underline{n = 1000}$ |                     |
|-----|----------|----------------------|---------------------|----------------------|---------------------|-----------------------|---------------------|-----------------------|---------------------|-----------------------|---------------------|------------------------|---------------------|
|     |          | $\hat{\theta}_{EFS}$ | $\hat{\theta}_{NA}$ | $\hat{\theta}_{EFS}$ | $\hat{\theta}_{NA}$ | $\hat{\theta}_{EFS}$  | $\hat{\theta}_{NA}$ | $\hat{\theta}_{EFS}$  | $\hat{\theta}_{NA}$ | $\hat{\theta}_{EFS}$  | $\hat{\theta}_{NA}$ | $\hat{\theta}_{EFS}$   | $\hat{\theta}_{NA}$ |
| 25  | 10       | 165 (5.6)            | 148 (5.2)           | 118 (3.6)            | 96 (3.3)            | 25.8 (-2.2)           | 25.2 (-2.4)         | 25.2 (-3.2)           | 25.3 (-3.3)         | 26.2 (-3.6)           | 26.2 (-3.7)         | 31.9 (-4.7)            | 32.0 (-4.8)         |
|     | 100      | 19920 (89)           | 15843 (73)          | 18664 (82)           | 14799 (66)          | 3753 (-59)            | 4004 (-61)          | 4280 (-6)             | 4530 (-66)          | 4710 (-67)            | 4946 (-70)          | 5536 (-74)             | 5338 (-75)          |
| 50  | 10       | -                    | -                   | 75.4 (2.5)           | 75.2 (2.7)          | 36.2 (0)              | 35.7 (0.12)         | 28.2 (-1.1)           | 27.8 (-1)           | 24.9 (-1.9)           | 24.2 (-1.8)         | 25.4 (-3.1)            | 24.6 (-3)           |
|     | 100      | -                    | -                   | 14196 (55)           | 8334 (35)           | 2342 (-12)            | 1822 (-21)          | 2003 (-27)            | 1967 (-33)          | 2266 (-36)            | 2352 (-41)          | 2977 (-49)             | 3224 (-53)          |
| 100 | 10       | -                    | -                   | -                    | -                   | 38.5 (0.7)            | 40.3 (1.0)          | 37.4 (0.5)            | 38.9 (0.8)          | 32.7 (-0.1)           | 33.6 (0.21)         | 24.3 (-2)              | 24.3 (-1.8)         |
|     | 100      | -                    | -                   | -                    | -                   | 3102 (5.8)            | 2343 (-0.8)         | 3252 (8.8)            | 2470 (2.1)          | 2282 (-6.2)           | 1831 (-12)          | 2032 (-25.6)           | 1928 (-30)          |

SUPPLEMENTARY TABLE 3. **Effect of subsampling on  $\theta$  estimation.** All subsampling results are based on 10,000 independent estimates of  $\theta$ . For ease of comparison, the results from non-subsampling estimates are repeated from Table 1. Boldface statistics indicate combinations of  $\theta$  and  $n$  for which subsampling improved estimation in terms of MSE.

| $\theta$ | $n$              | $\hat{\theta}_x$      | $\hat{\theta}_{NA}$    | $\hat{\theta}_{EFS}$   |
|----------|------------------|-----------------------|------------------------|------------------------|
| 5        | 150 subsampling  | <b>5.75 (-1.00)</b>   | <b>6.77 (-0.85)</b>    | <b>6.88 (-1.02)</b>    |
|          | 150              | 6.66 (-0.36)          | 8.22 (-0.12)           | 7.89 (-0.35)           |
|          | 250 subsampling  | <b>5.64 (-0.93)</b>   | <b>6.68 (-0.78)</b>    | <b>6.79 (-0.96)</b>    |
|          | 250              | 7.30 (-0.11)          | 9.29 (0.17)            | 8.65 (-0.15)           |
|          | 500 subsampling  | <b>5.52 (-0.78)</b>   | <b>6.68 (-0.61)</b>    | <b>6.72 (-0.80)</b>    |
|          | 500              | 7.60 (0.06)           | 11.78 (0.71)           | 9.95 (0.27)            |
|          | 1000 subsampling | <b>5.41 (-0.85)</b>   | <b>6.45 (-0.68)</b>    | <b>6.53 (-0.88)</b>    |
|          | 1000             | 8.34 (0.30)           | 13.33 (0.99)           | 10.79 (0.48)           |
| 10       | 150 subsampling  | <b>20.03 (-2.67)</b>  | <b>22.14 (-2.02)</b>   | <b>22.80 (-2.23)</b>   |
|          | 150              | 20.84 (-1.46)         | 27.45 (-0.61)          | 26.22 (-0.98)          |
|          | 250 subsampling  | <b>19.67 (-1.94)</b>  | <b>22.42 (-1.72)</b>   | <b>23.01 (-1.94)</b>   |
|          | 250              | 22.58 (-0.82)         | 23.43 (0.15)           | 28.68 (-0.27)          |
|          | 500 subsampling  | <b>19.10 (-2.26)</b>  | <b>22.16 (-1.53)</b>   | <b>22.66 (-1.78)</b>   |
|          | 500              | 22.92 (-0.66)         | 37.99 (1.04)           | 33.26 (0.38)           |
|          | 1000 subsampling | <b>18.75 (-2.14)</b>  | <b>22.00 (-1.39)</b>   | <b>22.47 (-1.64)</b>   |
|          | 1000             | 24.72 (-0.14)         | 43.79 (1.70)           | 36.86 (0.90)           |
| 25       | 150 subsampling  | 130.81 (-6.48)        | <b>119.96 (-6.48)</b>  | <b>125.61 (-6.58)</b>  |
|          | 150              | 114.45 (-6.08)        | 138.76 (-2.57)         | 138.17 (-3.07)         |
|          | 250 subsampling  | 126.28 (-8.65)        | <b>117.47 (-7.01)</b>  | <b>123.37 (-6.15)</b>  |
|          | 250              | 113.93 (-4.53)        | 161.29 (0.55)          | 152.06 (-1.34)         |
|          | 500 subsampling  | 119.64 (-8.12)        | <b>113.95 (-5.35)</b>  | <b>120.03 (-5.49)</b>  |
|          | 500              | 118.14 (-3.67)        | 200.40 (1.92)          | 188.00 (0.88)          |
|          | 1000 subsampling | <b>118.21 (-7.92)</b> | <b>114.35 (-5.10)</b>  | <b>120.74 (-5.24)</b>  |
|          | 1000             | 122.70 (-2.57)        | 231.52 (3.42)          | 210.54 (2.12)          |
| 75       | 150 subsampling  | 1587.9 (-37.05)       | 1166.4 (-27.81)        | 1159.8 (-26.12)        |
|          | 150              | 1144 (-26.32)         | 963.6 (-13.19)         | 1044 (-13.37)          |
|          | 250 subsampling  | 1474.6 (-35.15)       | 1076.5 (-25.24)        | <b>1084.9 (-23.39)</b> |
|          | 250              | 1010 (-20.38)         | 1061 (-5.35)           | 1178 (-6.08)           |
|          | 500 subsampling  | 1386.6 (-33.42)       | <b>1024.2 (-22.88)</b> | <b>1054.4 (-20.79)</b> |
|          | 500              | 1001 (-17.60)         | 1560 (3.69)            | 1730 (4.08)            |
|          | 1000 subsampling | 1350.4 (-32.77)       | <b>999.1 (-22.00)</b>  | <b>1037.5 (-19.85)</b> |
|          | 1000             | 987 (-13.56)          | 1917 (9.76)            | 2044 (9.32)            |
