# Supplementary material
Source: PubMed Central journal article supplement (PMC3299306)

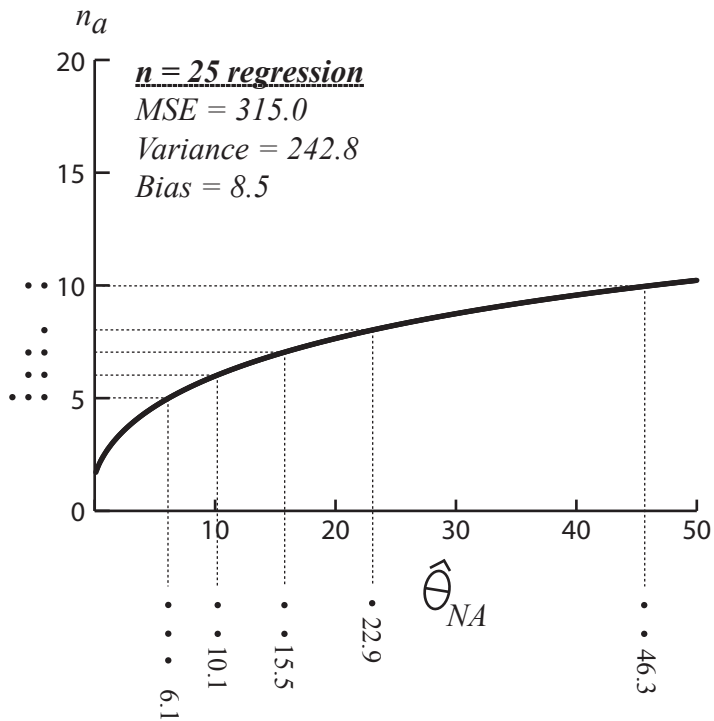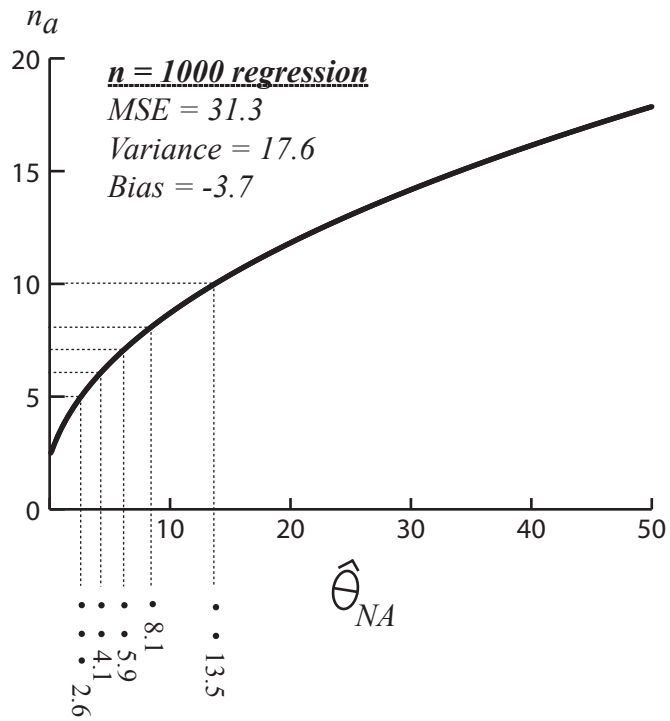

Supplement: supp_msq164_mbe-10-0232-File007.pdf [file supp_msq164_mbe-10-0232-File007.pdf]

### Gamma approximation

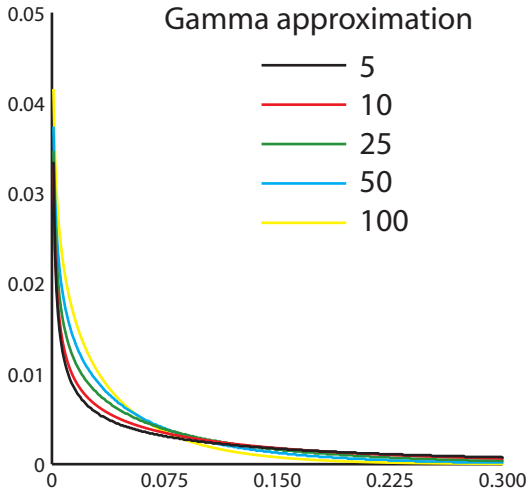

### Exponential approximation

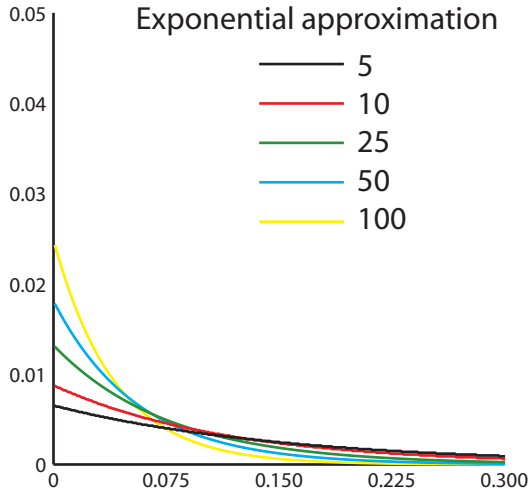

Supplement: supp_msq164_mbe-10-0232-File008.pdf [file supp_msq164_mbe-10-0232-File008.pdf]
